# Supplementary material
Source: PubMed Central journal article supplement (PMC5375631)
Supplement: ry161174suppa1.pdf [file ry161174suppa1.pdf]

**Table E1. Demographic Characteristics of Randomly Selected Women**

| Characteristic               | Study Population | U.S. Population*   |
|------------------------------|------------------|--------------------|
| Total no. of women           | 792 808          | 303 965 272        |
| Race                         |                  |                    |
| White, non-Hispanic          | 508 202 (68.6)   | 196 817 552 (63.7) |
| Black, non-Hispanic          | 84 080 (11.3)    | 37 685 848 (12.2)  |
| Asian/Pacific Islander       | 76 850 (10.4)    | 14 946 700 (4.8)   |
| Native American              | 2535 (0.3)       | 2 247 098 (0.7)    |
| Latina                       | 30 516 (4.1)     | 50 477 594 (16.3)  |
| Mixed/other                  | 38 969 (5.3)     | 6 570 746 (2.1)    |
| Unknown                      | 51 656           |                    |
| Location <sup>†</sup>        |                  |                    |
| Urban                        | 446 768 (75.3)   | 249 253 271 (80.7) |
| Rural                        | 146 228 (24.7)   | 59 492 267 (19.3)  |
| Unknown                      | 23 684           |                    |
| Education <sup>‡</sup>       |                  |                    |
| No high school degree (%)    | 7.0              | 14.4               |
| Economic status <sup>§</sup> |                  |                    |
| Median family income (\$)    | 65 258           | 62 982             |

Note.—Data in parentheses are percentages.

\* Based on 2010 census data for the entire U.S. population.

† Excludes Chicago ( $n = 176\ 128$ ) in study population.

‡ Women 18 years of age and older with available data.

§ Based on 2010 census data linked to screening mammograms at the women's block-group level.
